# Supplementary material for: Comparison of microbial and transient expression (tobacco plants and plant‐cell packs) for the production and purification of the anticancer mistletoe lectin viscumin
Source: PubMed Central journal article supplement — Biotechnol Bioeng. 2019 Jun 29;116(9):2236–49. doi: 10.1002/bit.27076 (PMC6772165; doi:10.1002/bit.27076), 2019-06-29
Supplement: BIT-116-2236-s001.pdf [file BIT-116-2236-s001.pdf]

## 1 Supporting information

### 2 Table S1: Factors and levels tested in the *N. tabacum* BY-2 PCP extraction DoE approach.

| Factor                                            | Levels |       |       |   |
|---------------------------------------------------|--------|-------|-------|---|
| A-Incubation time [dpi]                           | 4      | 5     | 6     | 7 |
| B-Time of incubation with EB [min]                | 0      | 5     | 10    |   |
| C-Triton X-100 concentration [g L <sup>-1</sup> ] | 0.000  | 0.005 | 0.050 |   |
| D-pH of EB [-]                                    | 6.0    | 8.0   | 9.0   |   |
| E-Conductivity of EB [mS cm <sup>-1</sup> ]       | 15     | 35    | 55    |   |

3 EB: extraction buffer.

### 4 Table S2: Analysis of variance table of *N. tabacum* BY-2 PCP extraction DoE

| Source                                      | Sum of Squares     | df   | Mean Square | F Value | p-value  |             |                        |
|---------------------------------------------|--------------------|------|-------------|---------|----------|-------------|------------------------|
| Block                                       | 0.26               | 3    | 0.088       |         |          |             |                        |
| Model                                       | 4.46               | 5    | 0.89        | 69.21   | < 0.0001 | significant |                        |
| A-Incubation time [dpi]                     | 3.96               | 1    | 3.96        | 306.98  | < 0.0001 |             |                        |
| D-pH of EB [-]                              | 3.055E-003         | 1    | 3.055E-003  | 0.24    | 0.6283   |             |                        |
| E-Conductivity of EB [mS cm <sup>-1</sup> ] | 9.696E-003         | 1    | 9.696E-003  | 0.75    | 0.3894   |             |                        |
| DE                                          | 0.14               | 1    | 0.14        | 11.09   | 0.0015   |             |                        |
| A <sup>2</sup>                              | 0.23               | 1    | 0.23        | 18.20   | < 0.0001 |             |                        |
| Residual                                    | 0.79               | 61   | 0.013       |         |          |             |                        |
|                                             | <i>Lack of Fit</i> | 0.59 | 50          | 0.012   | 0.65     | 0.8500      | <i>not significant</i> |
|                                             | <i>Pure Error</i>  | 0.20 | 11          | 0.018   |          |             |                        |
| Cor Total                                   | 5.51               | 69   |             |         |          |             |                        |

5 EB: extraction buffer.

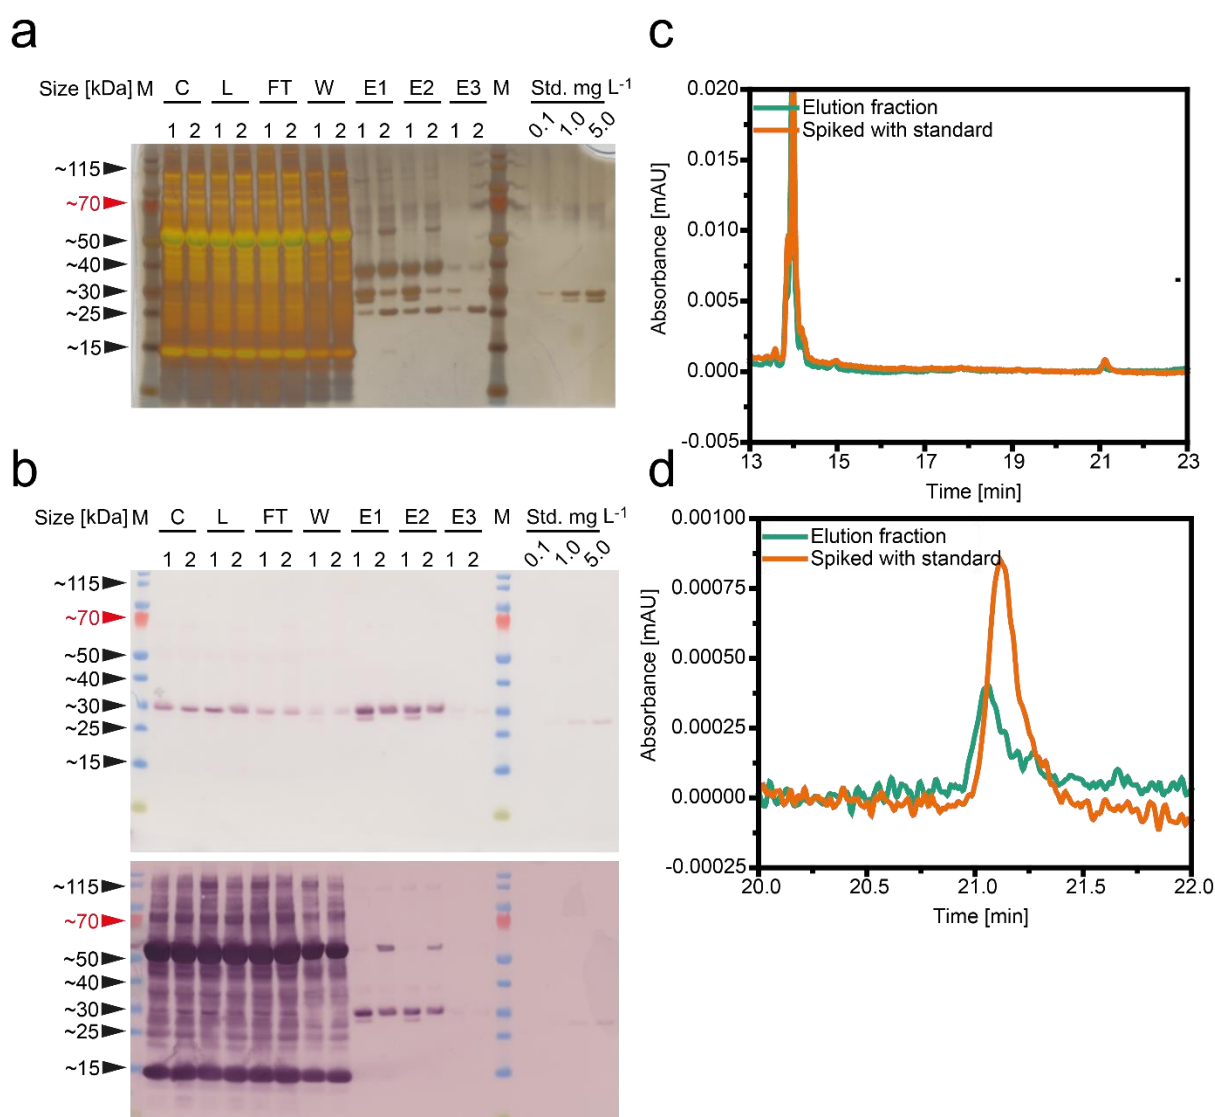

6

7 Figure S1: Protein composition analysis of purification intermediates by LDS-PAGE. a.  
 8 Silver staining. C: centrate; L: affinity chromatography load; FT: flow-through; W: wash; E:  
 9 elution fraction 1-3. M: Marker; 1 and 2: extract batches of two biological replicates. Std.:  
 10 refolded viscumin (non-glycosylated) purified from *E. coli*. b. Western blot using primary  
 11 mAb TA-5 (top) and an alkaline phosphatase-labeled goat anti-mouse IgG secondary  
 12 antibody. The blot was then stained again with an anti-host cell protein polyclonal antibody  
 13 as primary antibody (Arfi et al. 2016) and the same secondary antibody as before (bottom). c.  
 14 Electropherogram of a sample of affinity purified, plant-derived viscumin (green) and the  
 15 same sample spiked with 20 mg L<sup>-1</sup> bacterial viscumin standard (orange). The peak at 14 min  
 16 retention time corresponds to the buffer components, whereas the peak at ~21 min

17 corresponds to viscumin. d. A zoomed-in section of the data shown in c focusing on the  
 18 recombinant viscumin and avoiding the system peak at 14 mL. Colors are as in c.  
 19

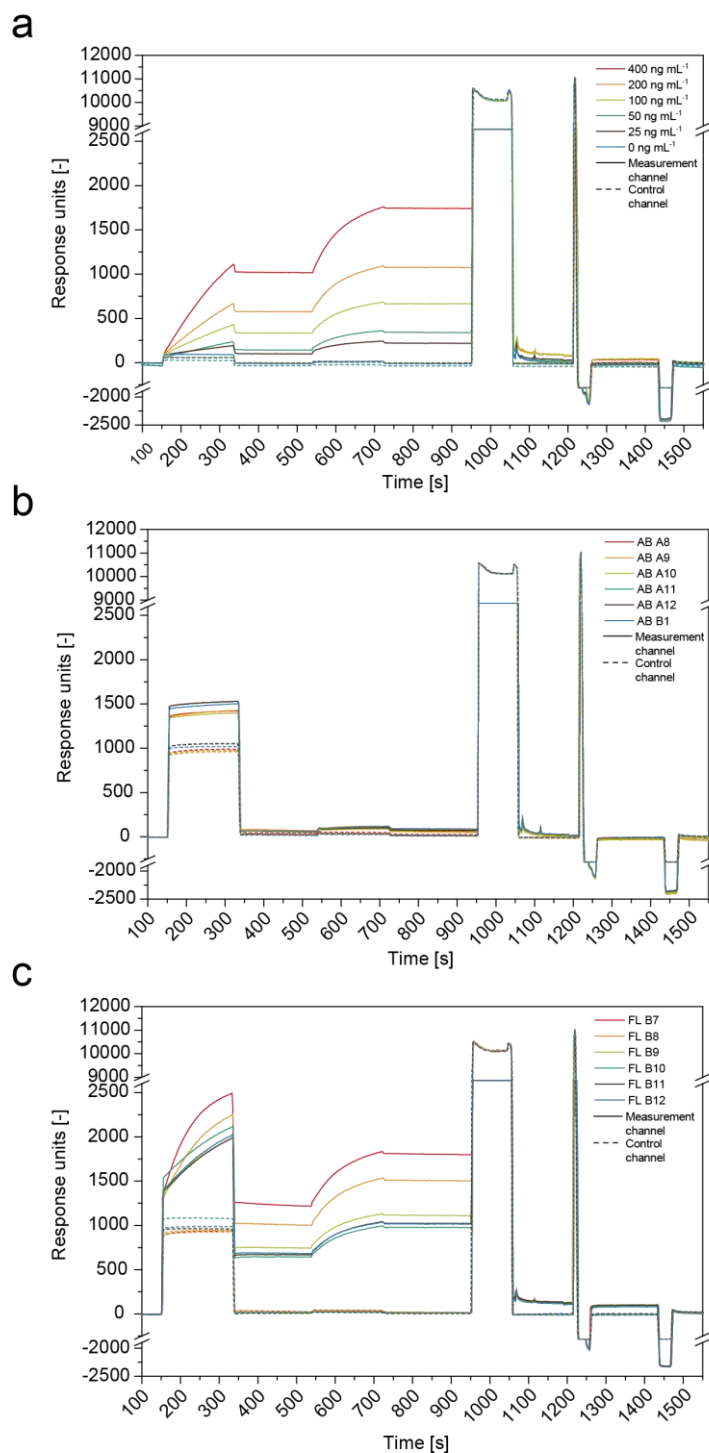

20

21 Figure S2: SPR sensograms of viscumin-containing *N. benthamiana* leaf extracts obtained 5  
 22 days post infiltration. Six biological replicates per infiltration set are shown. Each sample was  
 23 injected at 150 s on chip with B chain-specific 36-2-0 mAb. After a wash, A chain-specific

24 mAb TA-5 was injected at 550 s and chip regeneration was started at 950 s. The  
25 measurement channel is shown as a solid line whereas the control channel is as dotted line. a.  
26 Measurement of viscumin standard ranging from 0 to 400 ng mL<sup>-1</sup> using refolded viscumin  
27 (non-glycosylated) purified from *E. coli*. b. visA and visB co-infiltration samples (loaded  
28 from well A8-B1 of the SPR device). c. visFL infiltration samples (loaded from well B7-B12  
29 of the SPR device).
